# Supplementary material for: Taurochenodeoxycholic acid inhibits intestinal epithelial cell proliferation and induces apoptosis independent of the farnesoid X receptor
Source: Royal Society of Chemistry journal article supplement (doi:10.1039/d3fo00770g), 2023-01-01
Supplement: d3fo00770g1.pdf [file d3fo00770g1.pdf]

## **Supporting information**

### **Materials and Methods**

#### **Animal experiment**

C57BL/6 male mice (8 weeks of age) were purchased from STJ Laboratory Animal Co., LTD (Hunan, China). Then, the mice were housed in 1/mice per cage under the same condition (temperature,  $23\pm 2^{\circ}\text{C}$ ; lighting cycle, 12h:12h light/dark; 8:00-20:00 for light) and allowed free access to water and feed. These 18 male mice were randomly divided into 3 groups (6 mice per group). Then the mice were orally given distilled water (CON group) or 100 mg/kg, 200 mg/kg (according to the body weight) of TCDCA for 10 days.

#### **Targeted metabolomics of bile acids**

A 70  $\mu\text{L}$  volume of serum was transferred to an EP tube. After the addition of 280  $\mu\text{L}$  extract solvent (acetonitrile-methanol, 1:1), the samples were vortexed for 30 s, sonicated for 15 min in ice-water bath followed by incubation at  $-40^{\circ}\text{C}$  for 1 h and centrifugation at 12000 rpm (RCF=13800( $\times g$ ), R= 8.6 cm) and  $4^{\circ}\text{C}$  for 15 min. The clear supernatants were transferred to an auto-sampler vial for UHPLC-MS/MS analysis. Stock solutions were individually prepared by dissolving or diluting each standard substance to give a final concentration of 1 mg/mL. An aliquot of each of the stock solutions was transferred to a flask to form a mixed working standard solution. A series of calibration standard solutions were then prepared by stepwise dilution of this mixed standard solution (containing isotopically-labelled internal standard mixture in identical concentrations with the samples). The UHPLC separation was carried out using an UHPLC System (Vanquish, Thermo Fisher Scientific), equipped with a Waters ACQUITY UPLC BEH C18 column (150 \* 2.1 mm, 1.7  $\mu\text{m}$ , Waters). The mobile phase A was 5 mmol/L ammonium acetate in water, and the mobile phase

B was acetonitrile. The column temperature was set at 45 °C. The auto-sampler temperature was set at 4 °C and the injection volume was 1 µL.

A Orbitrap Exploris 120 mass spectrometer (Thermo Fisher Scientific) was applied for assay development. Typical ion source parameters were: spray voltage = +3500/-3200 V, sheath gas (N<sub>2</sub>) flow rate = 40, aux gas (N<sub>2</sub>) flow rate = 15, sweep gas (N<sub>2</sub>) flow rate = 0, aux gas (N<sub>2</sub>) temperature = 350 °C, capillary temperature = 320 °C.

The parallel reaction monitoring (PRM) parameters for each of the targeted analytes were optimized, by injecting the standard solutions of the individual analytes, into the API source of the mass spectrometer. Since most of the analytes did not show product ion acceptable for quantification, the precursor ion in high resolution was selected for quantification.

### **Construction of FXR overexpression IPEC-J2 cell line**

The construction of cells was conducted by Cyagen Biology (Suzhou, China) Biotechnology Co., Ltd. Add lentivirus vector containing LV-EFS>pNR1H4/FLAG tag-CMV>mCherry/T2A/Puro (overexpression group) or LV-CMV>mCherry/T2A/Puro (control group) into IPEC-J2 cells at the ratio of MOI=1:10. At 48-72 hours post-infection, cells with successful overexpression were selected using puromycin (3 mg/mL). Following the completion of drug screening, the cells were maintained with a concentration of 1.5µg/mL to ensure stable expression. The expression of the FXR gene was determined through fluorescence quantitative PCR analysis.

**Table S1 The primer sequence of pig**

| Genes          | Sense (5'-3')           | Anti-sense(5'-3')      | Product length |
|----------------|-------------------------|------------------------|----------------|
| $\beta$ -actin | GAGATTGGCATGGCTTTATTTG  | ACTGCTGTCACCTTCACCGTT  | 127            |
| TGR5           | TGCTGTCCCTCATCTCATTGG   | TGTGTAGCGATGATCACCCAG  | 80             |
| FXR            | ACCACTGCTTGAGGTGCTACA   | ATGTCGCAACTCAGTCAGG    | 101            |
| CDX2           | AGGACGAAAGACAAATACCGAGT | CCTTTCTCCGAATGGTGATGT  | 100            |
| Ki67           | AGAACAAAGCCGTCAAGCG     | TGCTGAACTGGTTCTGAAGGAT | 105            |
| PCNA           | TAATGCAGACACCTTGGCACT   | GCAAATTCACCAGAAGGCATC  | 152            |
| Caspase 3      | GGAATGGCATGTCGATCTGGT   | ACTGTCCGTCTCAATCCCAC   | 351            |
| Caspase 9      | TGGAACTCAAGCCAGAGGAG    | CTGCATTCAGGACGTAAGCC   | 195            |
| Bcl-2          | TATTGGTGAGTCGGATCGCA    | CTCTCAGCTGCTGCATTGTT   | 127            |
| Bax            | AAGCGCATTGGAGATGAACT    | CGATCTCGAAGGAAGTCCAG   | 251            |

**Table S2 The primer sequence of mice**

| Genes          | Sense (5'-3')           | Anti-sense(5'-3')       | Product length |
|----------------|-------------------------|-------------------------|----------------|
| $\beta$ -actin | GTGACGTTGACATCCGTAAGA   | GTAACAGTCCGCCTAGAAGCAC  | 287            |
| TGR5           | CAGTCTTGGCCTATGAGCGT    | CTGCCAATGAGATGAGCGA     | 70             |
| FXR            | CAAAATGACTCAGGAGGAGTACG | GCCTCTGTCCCTTGATGTATTG  | 84             |
| CDX2           | CCGAGAGGCAGGTAAAATTTGG  | CTGAGGCTGGGAAGGTTGTG    | 100            |
| Ki67           | ACCGTGGAGTAGTTTATCTGGG  | TGTTCCAGTCCGCTTACTTCT   | 126            |
| PCNA           | GAAGTTTTCTGCAAGTGGAGAG  | CAGGCTCATTCTCTATGGT     | 107            |
| Caspase 3      | TGGAATGTCATCTCGCTCTGGT  | GAAGAGTTTCGGCTTCCAGTC   | 298            |
| Caspase 9      | GACCAATGGGACTCACAGCAA   | GTTACATTGTTGATGATGAGGCA | 281            |
| Bcl-2          | GCTACCGTCGTGACTTCGCA    | CATCCAGCCTCCGTTATCC     | 270            |
| Bax            | GCCTTTTGCTACAGGGTTTCAT  | TATTGCTGTCCAGTTCATCTCCA | 151            |

Table

Table S3. The bile acid composition and concentration in the serum of mice (nmol/L)

| id | Compound name                                | CON              | 200 mg/kg TCDCa    | P-Value |
|----|----------------------------------------------|------------------|--------------------|---------|
| 1  | Taurocholic acid                             | 756.2 ± 442.01   | 12917.61 ± 7442.75 | 0.343   |
| 2  | Cholic acid                                  | 436.74 ± 242.50  | 5937.50 ± 3682.55  | 0.486   |
| 3  | Chenodeoxycholic acid                        | 139.00 ± 20.24   | 676.5375 ± 281.98  | 0.029   |
| 4  | Taurochenodeoxycholic acid                   | 186.59 ± 33.40   | 1382.35 ± 663.13   | 0.029   |
| 5  | Tauroolithocholic acid                       | ND               | 1.43 ± 0.32        | 0.057   |
| 6  | Lithocholic acid                             | 12.68 ± 7.17     | 19.3 ± 10.22       | 0.343   |
| 7  | Tauro ω-muricholic acid                      | 146.15 ± 76.17   | 1315.16 ± 880.66   | 0.686   |
| 8  | Tauro α-Muricholic acid                      | 351.71 ± 66.30   | 6516.94 ± 3718.28  | 0.486   |
| 9  | Tauro β-Muricholic acid                      | 1181.8 ± 657.78  | 23645.3 ± 13818.50 | 0.343   |
| 10 | ω-Muricholic Acid                            | 254.375 ± 104.24 | 684.99 ± 440.81    | 0.686   |
| 11 | α-Muricholic acid                            | 46.66 ± 6.02     | 540.10 ± 302.99    | 0.486   |
| 12 | β-Muricholic acid                            | 584.15 ± 235.50  | 5191.05 ± 3362.10  | 1.000   |
| 13 | Tauroursodeoxycholic acid                    | 223.56 ± 41.65   | 1756.39 ± 909.22   | 0.200   |
| 14 | 6-Ketolithocholic acid                       | 1.35 ± 1.00      | 4.81 ± 2.91        | 0.686   |
| 15 | 7-Ketolithocholic acid                       | 18.54 ± 1.67     | 131.65 ± 74.52     | 0.057   |
| 16 | 12-Ketolithocholic acid                      | 0.34 ± 0.08      | 0.84 ± 0.29        | 0.486   |
| 17 | Ursodeoxycholic acid                         | 216.60 ± 20.51   | 550.69 ± 186.85    | 0.200   |
| 18 | Hyodeoxycholic acid                          | 4.93 ± 2.67      | 9.69 ± 1.85        | 0.343   |
| 19 | 6,7-Diketolithocholic acid                   | 3.82 ± 2.00      | 10.57 ± 7.19       | 1.000   |
| 20 | 7-Ketodeoxycholic acid                       | 72.8 ± 41.86     | 1156.98 ± 743.20   | 1.000   |
| 21 | 12-Dehydrocholic acid                        | 27.98 ± 16.17    | 344.68 ± 241.82    | 1.000   |
| 22 | 3-Dehydrocholic acid                         | 0.34 ± 0.083     | 87.35 ± 59.18      | 0.486   |
| 23 | Ursocholic acid                              | 3.84 ± 2.61      | 48.33 ± 33.25      | 1.000   |
| 24 | 3β-Cholic Acid                               | 9.66 ± 1.71      | 25.95 ± 5.64       | 0.029   |
| 25 | Hyochoolic acid                              | 0.34 ± 0.083     | 17.85 ± 11.60      | 0.486   |
| 26 | Allochoolic acid                             | 24.25 ± 15.16    | 340.04 ± 252.26    | 0.486   |
| 27 | Glycocholic acid                             | 2.32 ± 1.98      | 14.65 ± 8.41       | 0.686   |
| 28 | Taurohyodeoxycholic acid                     | 6.30 ± 2.98      | 15.68 ± 3.72       | 0.114   |
| 29 | Taurodeoxycholic acid                        | 5.07 ± 2.75      | 11.78 ± 5.10       | 0.686   |
| 30 | Glycolithocholic Acid-3-Sulfate              | 4.67 ± 2.62      | 64.18 ± 37.53      | 1.000   |
| 31 | Taurohyochoolic acid                         | ND               | 48.60 ± 28.70      | 0.000   |
| 32 | Glycochenodeoxycholic Acid-3-O-β-glucuronide | 1.33 ± 0.63      | 1.33 ± 0.64        | 1.000   |

Figure S1

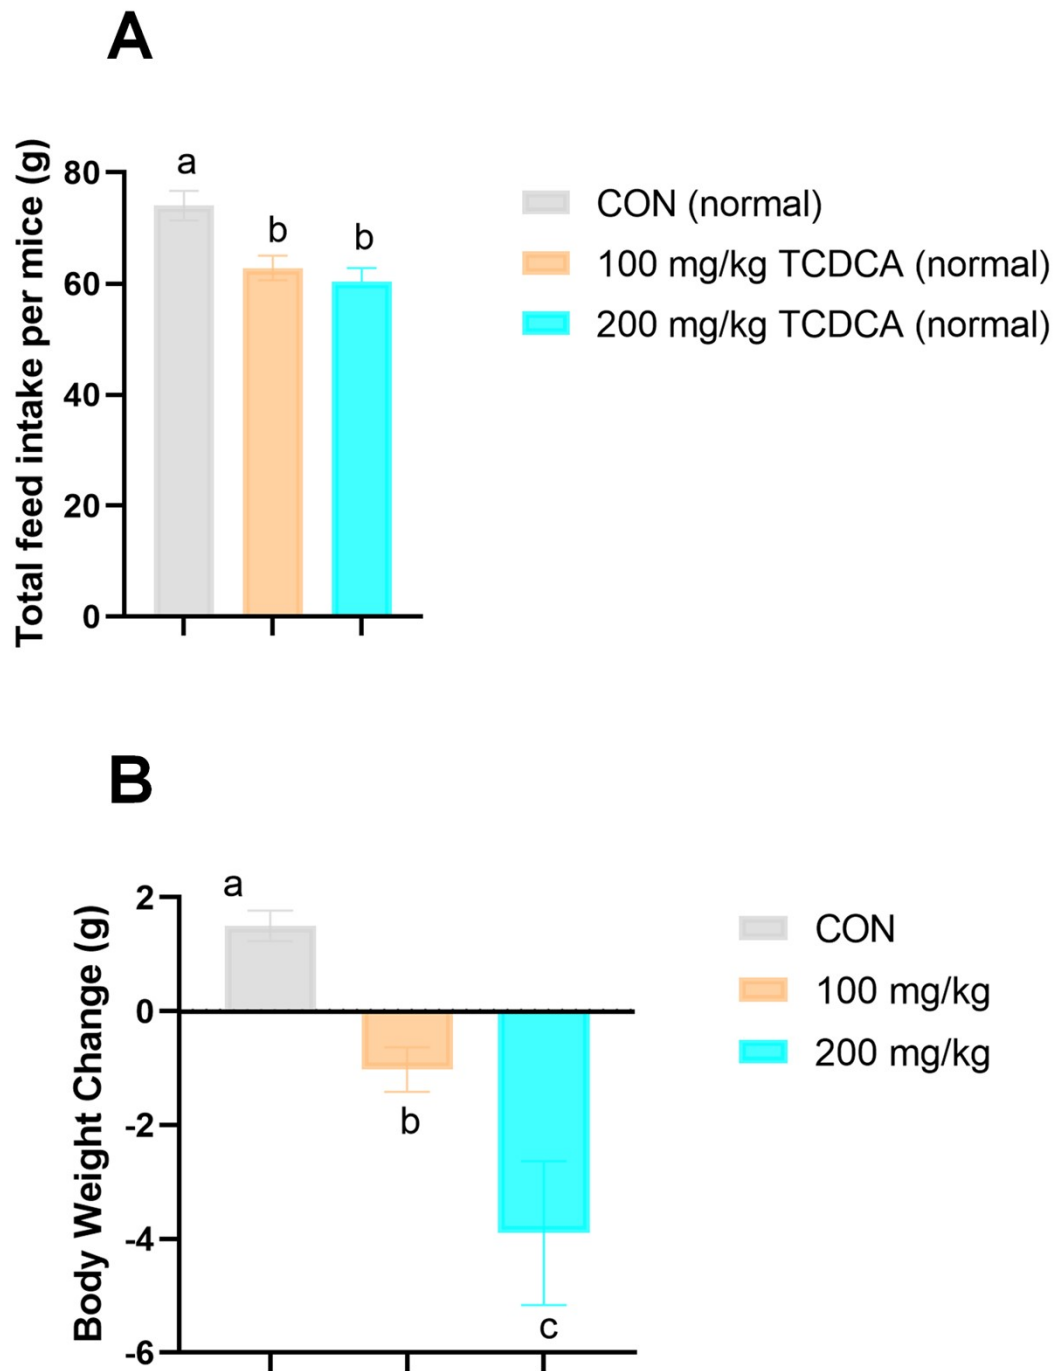

Figure S1. Effects of different doses of TCDCA on body weight and food intake of normal mice.

Figure S2

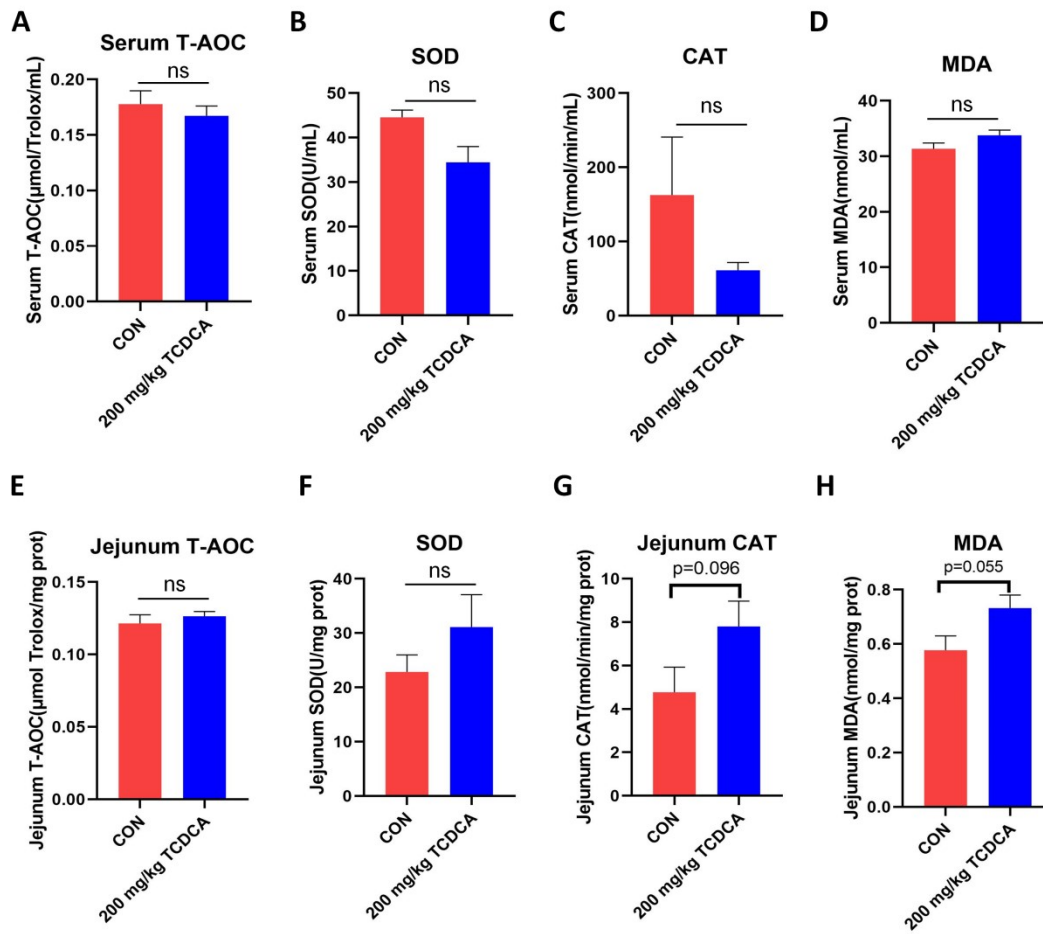

**Fig. S2** The changes of oxidative stress related index in the serum and Jejunum of mice after TCDD oral administration.(A-D) The indexes related to oxidative stress in serum. (E-H) The indexes related to oxidative stress in Jejunum (ns: no significant difference).

Figure S3

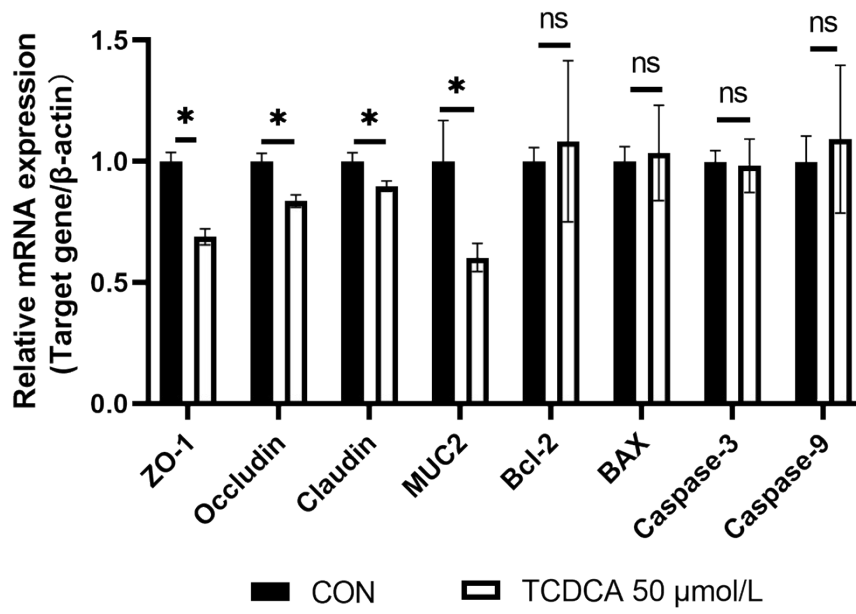

**Fig.S3** The effect of 50  $\mu$ mol/L TCDCA treatment on the gene expression related to tight junction and apoptosis. \*  $P < 0.05$ , ns: no significant difference.

Figure S4

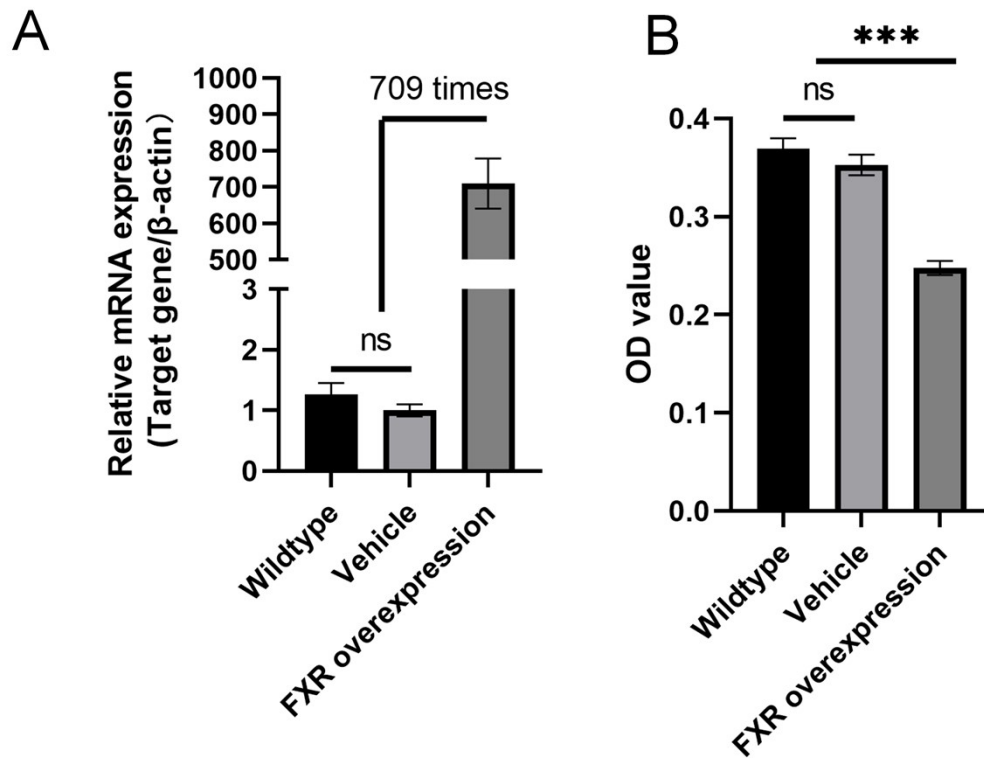

**Fig. S4** Effect of FXR overexpression on cell viability. (A) The FXR gene expression level among wild type, empty vehicle transfection group and FXR overexpression group. (B) Overexpression of FXR significantly inhibited cell viability. \*\*\*  $P < 0.001$ , ns: no significant difference
